# Supplementary material for: Solution-processed and self-powered photodetector in vertical architecture using mixed-halide perovskite for highly sensitive UVC detection
Source: Royal Society of Chemistry journal article supplement (doi:10.1039/d0ta08738f), 2020-12-09
Supplement: d0ta08738f1.pdf [file d0ta08738f1.pdf]

## Supporting Information

### **Solution-processed and self-powered photodetector in vertical architecture using mixed-halide perovskite for highly sensitive UVC detection**

Thi My Huyen Nguyen<sup>a</sup>, Sangmo Kim<sup>a</sup>, Chung Wung Bark<sup>\*a</sup>

<sup>a</sup>Department of Electrical Engineering, Gachon University, 1342 Seongnam-daero, Sujeong-gu, Seongnam-si, Gyeonggi-do 13120, Korea. E-mail: [bark@gachon.ac.kr](mailto:bark@gachon.ac.kr)

#### **Calculation of the trap density**

The trap densities of the electron/hole-only device were calculated using the following equation:

$$n_{traps} = \frac{2\varepsilon_0\varepsilon}{qV_{TFL}L^2}$$

where  $\varepsilon_0$  is the vacuum permittivity ( $\varepsilon_0 = 8.8542 \times 10^{-12}$ ),  $\varepsilon$  is the dielectric constant of perovskite ( $\varepsilon = 25$ ),  $q$  is the elementary charge ( $q = 1.6022 \times 10^{-19}$  C),  $L$  is the thickness of perovskite ( $L = 580$  nm) and  $V_{TFL}$  is the trap-filled limit voltages of the electron/hole-only device which determined by I-V curve in dark condition.  $V_{TFL}$  of the hole-only device and electron-only device were 0.195 V and 0.45 V, respectively. According to the above values, the hole and trap densities ( $n_{traps}$ ) of devices were estimated equal to  $1.6 \times 10^{15}$  cm<sup>-3</sup> and  $3.6 \times 10^{15}$  cm<sup>-3</sup>.

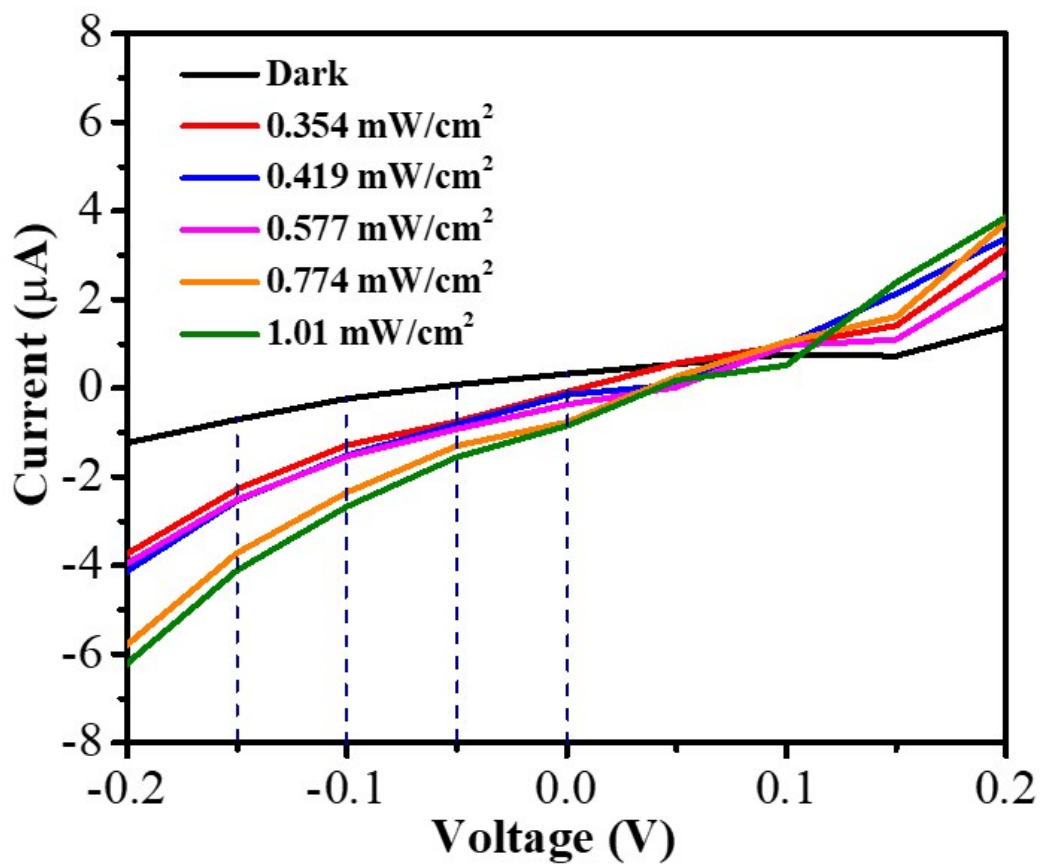

Fig. S1  $I$ - $V$  characteristics of the photodetector measured under dark and different light intensities at 254 nm light and 0 V bias voltage.

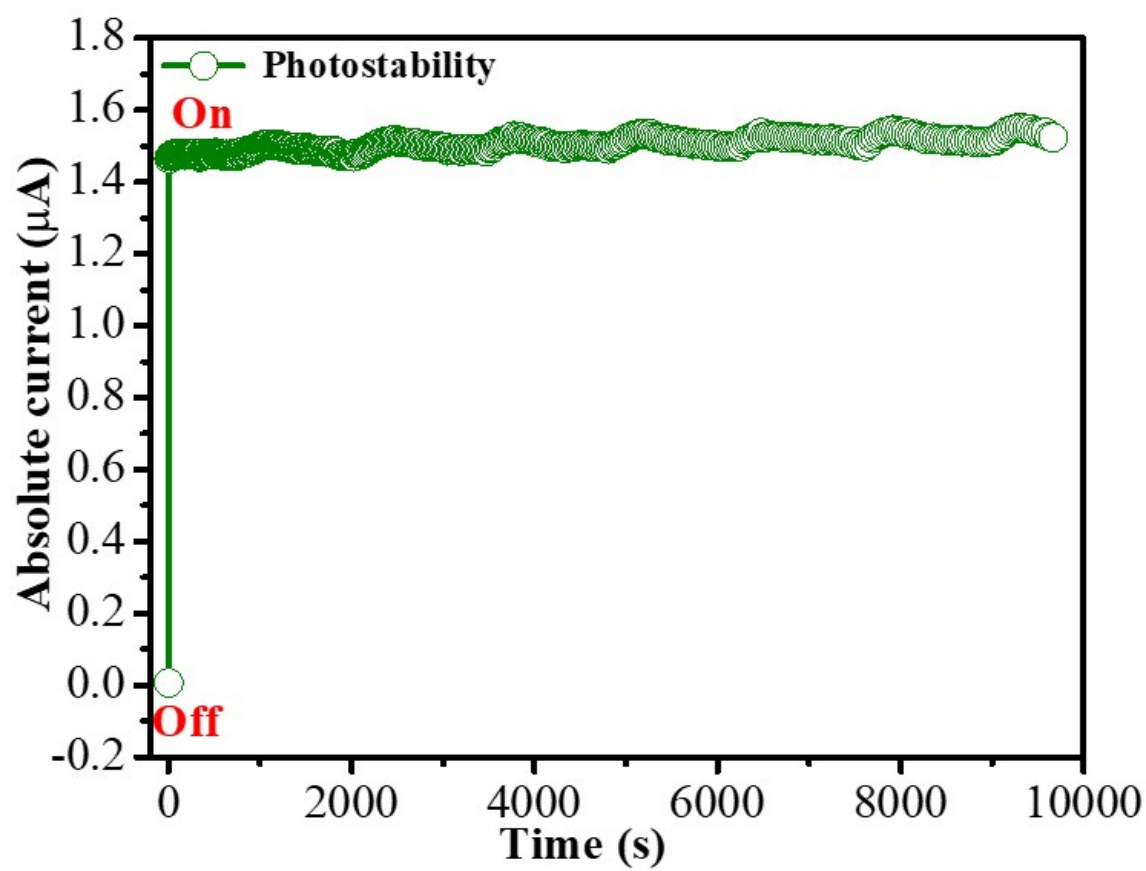

Fig. S2 The photostability of photodetector measured under 254nm-UVC light illumination.

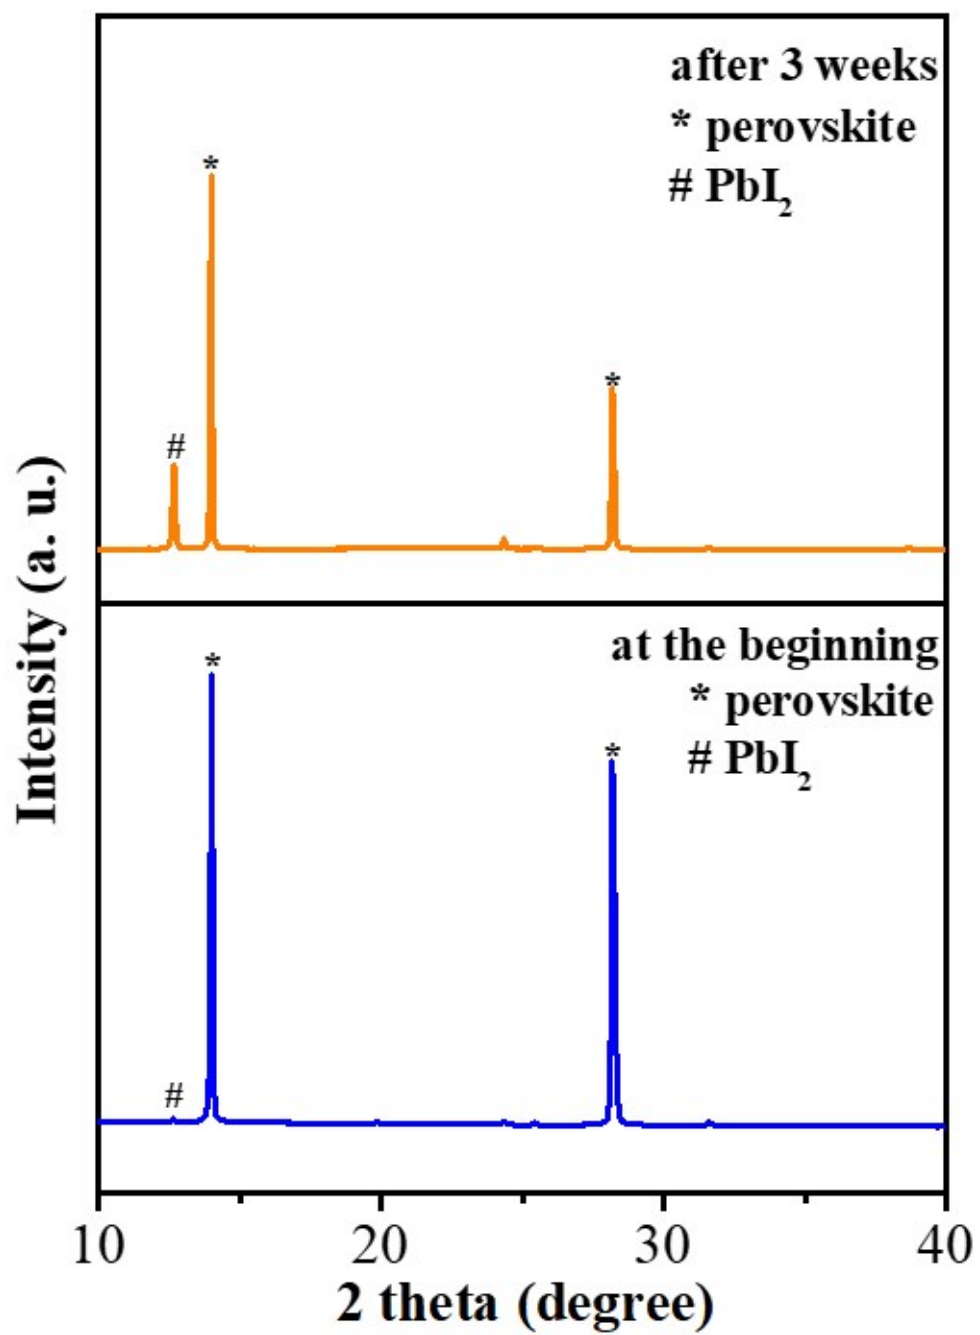

Fig. S3 The XRD patterns of perovskite film on quartz at the beginning and after 3 weeks

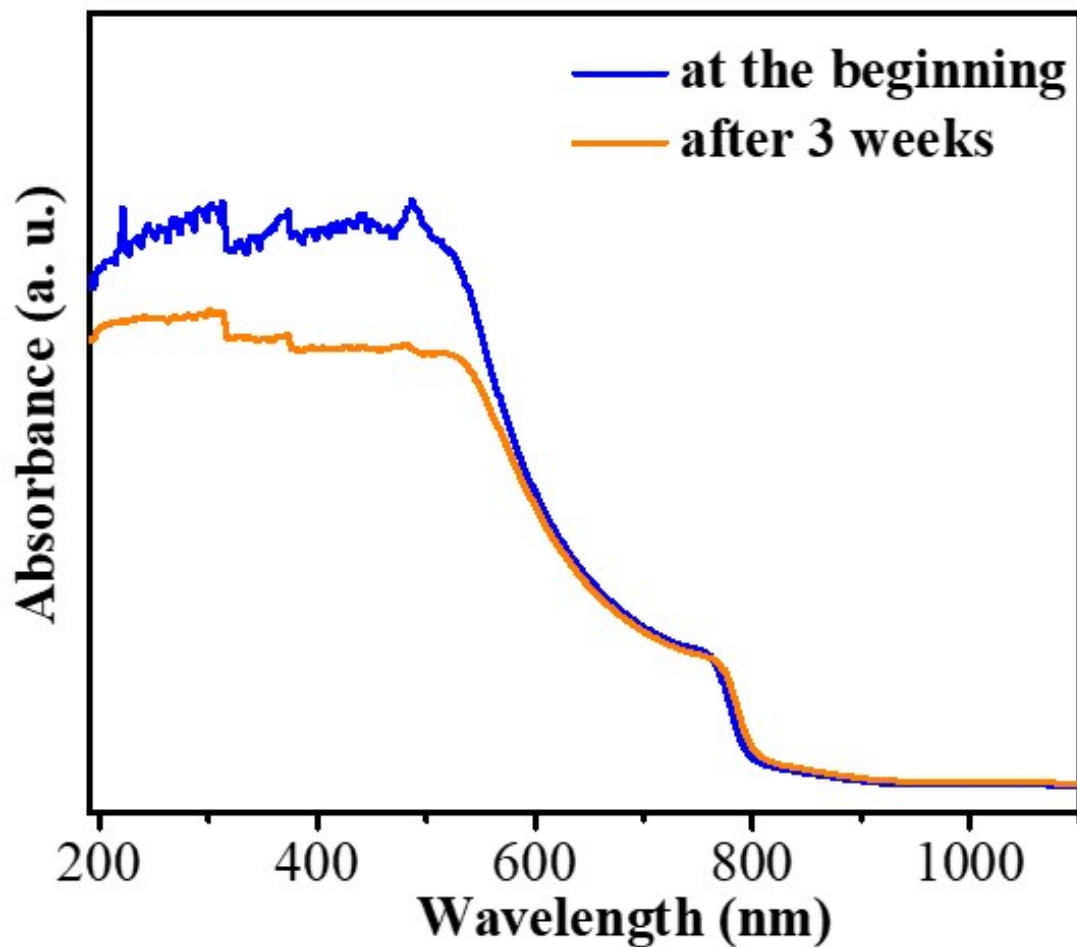

Fig. S4 The UV-vis spectra of perovskite film on quartz at the beginning and after 3 weeks

Table S1. The performance parameters of the photodetector with different bias voltages

| Light intensity<br>(mW/cm <sup>2</sup> ) | Voltage<br>(V) | Responsivity<br>(mA/W) | Detectivity<br>(Jones) | EQE<br>(%) |
|------------------------------------------|----------------|------------------------|------------------------|------------|
| 0.774                                    | 0              | 52.36                  | $4.23 \times 10^{11}$  | 25.61      |
| 0.774                                    | -0.05          | 50.07                  | $4.37 \times 10^{10}$  | 24.49      |
| 0.774                                    | -0.1           | 51.39                  | $2.33 \times 10^{10}$  | 25.13      |
| 0.774                                    | -0.15          | 57.28                  | $1.72 \times 10^{10}$  | 28.01      |
| 0.774                                    | -0.2           | 76.28                  | $1.73 \times 10^{10}$  | 37.31      |

Table S2. The performance parameters of the photodetector with different light intensities

| <b>Light intensity<br/>(mW/cm<sup>2</sup>)</b> | <b>Voltage<br/>(V)</b> | <b>Responsivity<br/>(mA/W)</b> | <b>Detectivity<br/>(Jones)</b> | <b>EQE<br/>(%)</b> |
|------------------------------------------------|------------------------|--------------------------------|--------------------------------|--------------------|
| 1.01                                           | 0                      | 44.63                          | $3.94 \times 10^{11}$          | 21.83              |
| 0.774                                          | 0                      | 52.68                          | $4.65 \times 10^{11}$          | 25.76              |
| 0.577                                          | 0                      | 47.78                          | $4.22 \times 10^{11}$          | 23.37              |
| 0.419                                          | 0                      | 42.72                          | $3.77 \times 10^{11}$          | 20.89              |
| 0.354                                          | 0                      | 44.08                          | $3.89 \times 10^{11}$          | 21.56              |
